1  
2  
3  
4  
5  
6  
7  
8  
9  
10  
11  
12  
13  
14  
15  
16  
17  
18  
19  
20

## First detection of herpesvirus and mycoplasma in free-ranging

Hermann's tortoises (*Testudo hermanni*), and in potential pet vectors

Ballouard J-M<sup>1</sup>, Bonnet X<sup>2</sup>, Jourdan J<sup>1</sup>, Martinez-Silvestre A<sup>3</sup>, Gagno S<sup>1</sup>, Fertard B<sup>4</sup>, & Caron S<sup>1</sup>

<sup>1</sup> SOPTOM, Centre de Recherche et de Conservation des Chéloniens (CRCC), BP24, 83660 Gonfaron, France

<sup>2</sup> CEBC, UMR-7372, CNRS-Université de La Rochelle, Villiers en Bois, France

<sup>3</sup> Catalanian Reptile and Amphibian Rehabilitation Center (CRARC), 08783 Masquefa, Barcelona, Spain

<sup>4</sup> Vétérinaire, Résidence Jean Moulin, 38-40, Boulevard Jean Moulin, F-06110 Le Cannet, France

Contact: [sebastien.caron@soptom.org](mailto:sebastien.caron@soptom.org); [jean-marie.ballouard@soptom.org](mailto:jean-marie.ballouard@soptom.org)

21

22 **Abstract**

23 Two types of pathogens cause highly contagious upper respiratory tract diseases (URTD) in  
24 Chelonians: testudinid herpesviruses (TeHV) and a mycoplasma (*Mycoplasma agassizii*). In  
25 captivity, these infections are frequent and can provoke outbreaks. Pet trade generates  
26 international flow of tortoises, often without sanitary checking; individuals intentionally or  
27 accidentally released in the wild may spread pathogens. A better understanding of the  
28 transmission of infectious agents from captivity to wild tortoises is needed. Many exotic  
29 individuals have been introduced in populations of the endangered western Hermann's  
30 tortoise (*Testudo hermanni hermanni*), notably spur-thighed tortoises (*Testudo graeca*). We  
31 assessed the presence of TeHV and mycoplasma in native western Hermann's tortoises and  
32 in potential pet vectors in south-eastern France. Using a large sample (N=572 tortoises), this  
33 study revealed the worrying presence of herpesvirus in 7 free-ranging individuals (3 sub-  
34 populations). Additionally, *Mycoplasma agassizii* was detected in 15 of the 18 populations  
35 sampled with a frequency ranging from 2.5 to 25%. Exotic spur-thighed tortoises showed  
36 high frequency of *Mycoplasma* infection in captivity (18%) and in individuals (50%) found in  
37 native Hermann's tortoise sub-populations, suggesting that this species could be a  
38 significant vector. The paucity of information of TeHV on European tortoise' URTD in natural  
39 settings, especially in combination with mycoplasma, prompts for further studies. Indeed,  
40 sick tortoises remain concealed and may not be easily detected in the field. Our results  
41 indicate that both the prevalence and health impact of URTD are high should be scrutinized  
42 in the field.

43

44 **Key words:** Emerging infectious diseases (EIDs), *Mycoplasma agassizii*, Testudinidae, upper  
45 respiratory tract diseases (URTD), reptiles.

## 46 Introduction

47 Emerging infectious diseases (EIDs) represent a growing challenge for biodiversity  
48 conservation (Daszak et al., 2000; Deem et al., 2001). During the last decades, rapidly  
49 spreading diseases are suspected to have wreaked havoc worldwide among amphibians and  
50 reptiles (Daszak et al., 2000). In tortoises, *Testudinid herpesviruses* (TeHV) and *Mycoplasma*  
51 *sp.* are two dangerous pathogens for wild populations (Origgi, 2012; Marenzoni et al., 2018).  
52 Both are highly contagious and are involved in the Upper Respiratory Tract Disease  
53 Syndromes (URTD); they can provoke high morbidity and mortality (Brown et al., 1994;  
54 Goessling et al., 2019). For example, in the 80's, *Mycoplasma* epizooties were responsible of  
55 multiple collapses of desert tortoise populations in North America (Jacobson et al., 1991;  
56 Brown et al., 1994). Currently, many tortoise species such as the Box turtle (*Coruea Borreti*),  
57 Gopher tortoise (*Gopherus agassizii*), or captive spur-thighed tortoise (*Testudo graeca*) are  
58 impacted by URTD (Marschang and Schneider, 2007; Weitzman et al 2017; DiGeronimo et  
59 al. 2019). Monitoring the health status of free-ranging chelonians, with a focus on URTD, is  
60 thus a conservation priority.

61 On the other hand, global trade of reptiles is flourishing; tens of thousands of individuals  
62 from an increasing number of species are displaced among continents under minimal (or  
63 non-existent for illegal trade) sanitary monitoring (Auliya et al., 2016). The resulting flows of  
64 individuals open major routes for the expansion of EIDs (DiGeronimo et al., 2019). Pet  
65 tortoises host both TeHV and *Mycoplasma sp.* (Martínez-Silvestre et al., 1999; Sandmeier et  
66 al., 2009; Lecis et al., 2011; Salinas et al., 2011; Origgi, 2012). Captive individuals are  
67 frequently released into the wild, intentionally or accidentally, often carrying pathogens  
68 that may threaten native populations of tortoises (Sandmeier et al., 2009; Jacobson et al.  
69 2014; Whitfield et al., 2018). The scarcity of investigations in natural populations, except in  
70 USA, means that possible role of pet tortoises as agents of contamination is not quantified

71 in Europe, as in most parts of the world (Jacobson and Berry, 2012; Kane et al., 2017; Orton  
72 et al., 2020).

73 Fragile inbred populations are particularly at risk. Reduced phenotypic diversity and  
74 genetic depression often hinder physiological and demographic resistances to diseases  
75 (Spielman et al., 2004). Many species are subjected to all the threats above, including the  
76 not yet evaluated risk of simultaneous contamination by TeHV and Mycoplasma. The  
77 Hermann's tortoise provides a typical example of such a situation. Two Hermann tortoise  
78 subspecies are currently recognized (Pérez et al., 2013): the Western Hermann's tortoise  
79 (WHT, *Testudo hermanni hermanni*) that occurs west of the Po Valley in Italy (e.g. Italian  
80 Peninsula, Sardinia, Corsica, southeastern France, northeastern Spain) and the Eastern  
81 Hermann's tortoise *T. h. boettgeri* (EHT) found in Mediterranean regions of the Balkan  
82 Peninsula and in small islands spread in the eastern Mediterranean sea. The two subspecies  
83 come into contact in north eastern Italy where they possibly hybridize naturally (Pérez et al.,  
84 2013). The WTH is severely threatened by habitat loss and fragmentation, frequent fires,  
85 illegal harvesting and predation by feral animals. As a result, continental populations  
86 drastically decreased (Livoreil 2009). Previously abundant in continental southeastern  
87 France, relict isolated WHT sub-populations persist in the Massif des Maures (Var district,  
88 83) and in adjacent plains (Livoreil, 2009; Bertolero et al., 2011). Delayed maturity, low  
89 fecundity and low population turn over mean that it is particularly sensitive to a decrease of  
90 adult survival (Bertolero et al., 2011).

91 Intensive and long-lasting legal and illegal pet trades (CITES 2014) provoked substantial  
92 introgression of EHT and of other tortoise species (e.g. spur-thighed tortoise) inside the  
93 natural repartition area of WTH (Martínez-Silvestre et al., 2001), while various species  
94 originating from other continents are sporadically found in the wild (unpublished data).  
95 These exotic tortoises easily breed in captivity are frequently owned as pets; they occur in

96 many properties spread across the entire (remaining) distribution range of the native WHT.  
97 A considerable pool of captive individuals from various uncontrolled provenances strongly  
98 enhances the likelihood of contacts with free-ranging native WHT.

99 Cross-species transmissions have been documented both for TeHV and mycoplasma;  
100 experiments demonstrated that these pathogens can infect Hermann and spur-thighed  
101 tortoises (Origgi et al., 2004; Soares et al., 2004; Salinas et al., 2011). In Europe, TeHV-1 and  
102 -3 affect most of the Testudinidae species raised in captivity (Origgi, 2012; Marschang and  
103 Schneider, 2007). More generally, ~48% of individuals belonging to various terrestrial and  
104 aquatic pet chelonians were positive for herpesvirus or mycoplasma while a positive  
105 correlation was observed between the two pathogen detection frequencies (Kolesnik et al.,  
106 2017). Like TeHV, mycoplasma was detected in tortoises kept in captivity and in outdoor  
107 enclosures in Europe (Lecis et al., 2011; Salinas et al., 2011).

108 Mortality due to TeHV and mycoplasma is well documented in wild tortoises in USA  
109 (Jacobson et al., 2012, 2014), but only in captivity in European tortoises (Mathes et al.,  
110 2001; Soares, 2004; Kolesnik, et al., 2017). In the latter, mortality rate caused by TeHV is  
111 higher in Hermann's tortoise compared to other species, suggesting a recent and more  
112 deleterious contact between the host and the pathogen (Soares et al., 2004). Possible  
113 occurrence and consequences of co-infection by TeHV and mycoplasma are not  
114 documented, at least in the Hermann's tortoise. Both frequency and possible severity of  
115 TeHV and mycoplasma infections remain unexplored in native populations of tortoises in  
116 Europe. Overall, possible impact of worrying EIDs has not been assessed in natural setting in  
117 the Mediterranean basin that hosts many endemic tortoises (Gracià et al., 2020). This issue  
118 is urgent because exogenous tortoises are frequently observed in the wild where they may  
119 carry new pathogens (Lecis et al., 2011; Hidalgo-Vila et al., 2020).

120 Accurate monitoring of the frequency of TeHV and mycoplasma infections and  
121 information about the prevalence of URTD in the remaining populations of WHT is thus  
122 needed. This, notably because these pathogens can induce deleterious chronic diseases that  
123 are not easily diagnosed in long-lived organisms (Sandmeier et al., 2013). This study reports  
124 results from the first comprehensive survey across the distribution range of the WHT in  
125 continental France.

126

## 127 **Material and methods**

### 128 *Tortoise sampling*

129 From 2012 to 2016, 18 sites were monitored covering most of the distribution area of the  
130 WTH subspecies in continental France (Figure 1; Livoreil, 2009). Free-ranging tortoises are  
131 cryptic; thus, in addition to visual searching, trained dogs were used (Ballouard et al., 2019).  
132 All tortoises sighted were captured: 457 free-ranging individuals (421 WHT and 36 exotic  
133 specimens) were sampled (25.5 tortoises per site on average). In addition, 95 pet tortoises  
134 were sampled in 21 different properties in surrounding areas (5.2 individuals per property  
135 on average). Finally, 20 vagrant individuals found in urban or peri-urban areas were also  
136 tested; likely they were pets intentionally released or that escaped from gardens. Most  
137 tortoises were adult (96%) and sex ratio was balanced (281 females, 267 males, 24  
138 immatures). Overall, with respect to sampling context, we obtained three categories of  
139 individuals: free-ranging, captive (pet) and vagrant tortoises (wild exotic pet) (N total=572).

140 Individuals were assigned to species (e.g. *T. graeca* vs. *T. hermanni*) or subspecies (WHT  
141 vs. EHT) according to their morphological characteristics. *Testudo* species are easily  
142 distinguished (Bertolero et al. 2011), subspecies not. The following criteria were used to  
143 discriminate WHT from EHT: yellow subocular scales, black continuous plastral bands,  
144 narrow vertebral scute, supracaudal scute divided, long corneous tip of the tail, corneous

145 tubercles on the inner side of the thigh, ratio of pectoral vs. femoral seams (Bertolero et al.,  
146 2011; Soler et al., 2012). Hybrids WHT x EHT displayed various combinations of phenotypic  
147 characters and could not be identified with certainty (especially F2, unpublished genetic  
148 results). Easily identifiable hybrids were brought to the SOPTOM rescue center.

149 Each tortoise was measured (Strait Carapace Length, SCL), sexed when possible (small  
150 immatures cannot be easily sexed), and weighted to the nearest g. Individuals larger than  
151 100 mm (SCL) were considered adult. Following blood, oral and nasal epithelium sampling,  
152 individuals were subjected to clinical inspection (see below), and then they were released at  
153 the place of capture, generally within 30 min. To ensure that researchers did not spread  
154 pathogens and did not contaminate samples, they cleaned their hands and clothes using  
155 VIRCON spray 1% (Bayer©); equipment was cleaned with alcohol. Samples were stored  
156 using one box per site.

157 Most individuals examined were free-ranging WHT (N=421; table 1). We identified 11  
158 EHT: 2 free-ranging individuals introduced into WHT populations, 8 captive (pets), and one  
159 vagrant. Thirty nine WHT x EHT easily identifiable hybrids were observed: 24 free-ranging, 9  
160 captive and 6 vagrants. Twenty four spur-thighed tortoises were examined: 10 of them were  
161 free-ranging and thus were introduced into WTH populations, 12 were found in private  
162 properties (pets), and 2 were vagrant. Finally, 1 captive marginated tortoise (*Testudo*  
163 *marginata*) was sampled.

164

#### 165 *Tissue sampling*

166 Blood (0.4 - 0.7 ml) was collected from the subcarapacial plexus (Hernandez-Divers *et al.*  
167 2002) using 1 ml syringes (Injekt-F – B Braun) and sterile needles (26G to 27G, TERUMO  
168 NEOLUS, adjusted to the size of the animal). Subcarapacial plexus delivers various mixtures  
169 of blood and lymph, especially using needles larger than 27G (Bonnet et al. 2016); we did

170 not notice such mixture during sampling. Blood was immediately placed in Sodium or  
171 Lithium heparin. Samples were gently homogenized and stored (max 4 hours) in ice-cooled  
172 containers until centrifugation (1500 rpm during 5 min). Plasma was stored at -25°C until  
173 analyses. Aliquots were distributed in two tubes: 50 µl for microbiological analysis and the  
174 rest for biochemical analyses.

175 We sampled oral and nasal epitheliums and mucus. We injected ~0.5 ml of sterile saline  
176 (0.9% sodium chloride, LAVOISIER) to flush the nasal cavity. The resulting fluid was collected  
177 with a syringe (0.1 ml) in each nostril and immediately stored in a 0.5 ml sterile conical tube.  
178 Oral samples were collected with a brush (Cervibrush + LBC, Endocervical sampler, CellPath)  
179 inserted inside the oral cavity: choana and mucosal surfaces of the tongue and of the beak  
180 were targeted. Brushes were stored individually in a 0.5 ml sterile conical tube containing  
181 0.3 ml of sodium chloride (0.9%) to avoid desiccation of the mucus. All samples were placed  
182 in ice-cooled containers in the field and stored at -25°C until analyses.

183 All samples were shipped frozen to Staaliches VetUAmt laboratory in Detmold, Germany,  
184 for analyses.

185

#### 186 *Pathogen screening*

187 The presence of Testudinid herpesvirus (TeHV-serotypes 1 and 3) was assessed using both  
188 polymerase chain reaction (PCR) and induced antibody responses (SN, Serum Neutralization  
189 test) (Soares et al., 2004; Salinas et al., 2011; Origgi, 2012). This test can be applied to TeHV-  
190 1 and TeHV-3 in any species of tortoise, with high sensitivity and specificity (Origgi et al.,  
191 2001, Origgi, 2012). A PCR test was considered positive for TeHV, when pathogen's DNA was  
192 detected in oral mucus. However, mucus of individuals that do not present clinical signs are  
193 less rich in viral DNA compared to the mucus of individuals displaying clinical signs (Origgi,



194 2012). Thus, we used SN test as a complementary method to detect the presence of TeHV  
195 types 1 and 3 Herpesvirus circulating antibodies on plasma aliquots (Orrigi, 2012).

196 The presence of *Mycoplasma agassizii* was assessed using polymerase chain reaction  
197 (PCR), no serological test being available in Europe during the study (2012-2016). Thus, PCR  
198 were used to detect active and not latent *Mycoplasma* and TeHV (Soares et al., 2004).

199 Many tortoises were tested for both pathogens. Table 2 provides the numbers of tests  
200 performed on the different categories and taxa of tortoises.

201

### 202 *Clinical inspection*

203 All tortoises were visually inspected for clinical symptoms of URTD disease that are usually  
204 associated with mycoplasma and herpesvirus infections (Jacobson et al., 2014): keratitis,  
205 conjunctivitis, ocular and palpebral oedema, and nasal discharges (mucopurulent oculonasal  
206 discharge), necrotic spots on the oral mucosa and on the tongue, rhinitis, lethargy and low  
207 body condition (Brown et al., 2002; Berry and Christopher, 2001; Sandmeier et al., 2009).

208

## 209 **Results**

210 PCR testing revealed that 7 free-ranging WHT were TeHV positive (1.5 %), and that 3 sub-  
211 populations (i.e. sites) were concerned (tables 3 and 4). Six adult females and 1 adult male  
212 were infected by testudinid herpesvirus. SN tests for TeHV were all negative (table 3).

213 A total of 52 individuals (species and subspecies pooled) were positive for mycoplasma  
214 (table 3). Most were free-ranging individuals (N=39, 8.7%) and most populations were  
215 infected (15 of 18) leading to a mean prevalence of 10.5% (range: 2.9% to 25%; Table 4).  
216 Among free-ranging tortoises, most positive cases concerned WHT (n=34, 8.6%) followed by  
217 spur-thighed tortoises (n=5, 50%). All species pooled, nine captive individuals were positive  
218 (10.5%) and were sampled in five private properties (among 21). They belonged to almost

219 all species and subspecies: 5 WHT (8.3%), 2 spur-thighed tortoises (18%), one *Testudo*  
220 *marginata* (100%), and one hybrid (20%). Among vagrants, 4 WHT were positives  
221 (prevalence = 40%). Focusing on WHT (wild, captive and vagrant pooled) positive for  
222 mycoplasma, 23 were females (9.5%) and 18 males (7.6%), two individuals were not sexed.  
223 No individual was positive for both pathogens.

224 Considering the whole sample, 28 individuals showed clinical symptoms of URTD; 4  
225 displayed palpebral oedema, 8 strong nasal discharges, and 14 abnormal mucus color (black,  
226 white or yellow). Among these 28 animals, 3 were tested positive for mycoplasma (2 with  
227 nasal discharges, one with palpebral oedema). The general condition of the tortoise was  
228 apparently normal otherwise and none exhibited ocular discharge.

229

## 230 **Discussion**

231 This study reveals the first cases of herpesvirus and mycoplasma infections in tortoises  
232 tested in natural populations in Europe (3 sub-populations for TeHV, 15 sub-populations for  
233 mycoplasma). Negative SN tests for TeHV despite PCR positive tests suggest possible recent  
234 infections. Results also reveal high levels of infection by mycoplasma in captive and vagrant  
235 individuals of different tortoise species sampled in the distribution range of the native  
236 species (WHT). Therefore, they reinforce the notion that pet tortoises, and thus  
237 international trade of chelonians, could represent a health threat to native tortoises. High  
238 levels of infection in the pet spur-thighed tortoise, both in captivity and in individuals  
239 introduced in the field (18% to 40%) compared to those observed in native WHT (approx.  
240 9%) suggests that this common exotic pet species may represent an important reservoir.

241 Finding that free-ranging tortoises can be infected by TeHv and mycoplasma in Europe,  
242 although worrying, is not fully surprising. Numerous assessments performed in captive  
243 tortoises maintained in cages or in outdoor enclosures (inaccurately considered as “wild” or

244 “free-living” individuals by various authors) showed that many individuals belonging to  
245 different lineages were infected by various pathogens involved in URTD. For example,  
246 herpesvirus was detected in 16% of individuals from different tortoise species maintained in  
247 captivity in Belgium; a country without native chelonian however (Kolesnik et al., 2017).  
248 Kolesnik et al. (2017) tested more than 1,000 captive tortoises and terrapins originating  
249 from different continents and maintained captive (e.g. in cage, enclosure, park, garden) in  
250 different European countries; more than 40% were infected by mycoplasma and 8% were  
251 infected by different viruses (notably herpesvirus). In Turkey, among 272 spur-thighed  
252 tortoises caught in the wild and kept in captivity (sometimes during years) to supply a  
253 breeding program designed to reinforce native populations, seroprevalences were as follow:  
254 37% positive for herpesvirus serotype-I, 5.5% for serotype-II, and ~5% for two other  
255 serotypes (X and reovirus) (Marschang and Schneider, 2007). Similar results were obtained  
256 with mycoplasma (Soares et al., 2004; Lecis et al., 2011). More generally, high infection  
257 prevalence for a wide range of pathogens have been observed in captive chelonians,  
258 notably in individuals intercepted during illegal trade (e.g. Marschang et al., 2009; Hidalgo-  
259 Vila et al., 2020).

260 Herpesvirus infections have been documented more than 40 years ago in American and  
261 in European chelonians (Origgi, 2012). However, previous assessments performed two  
262 decades ago in tortoises actually sampled in the field in France and Morocco (*Testudo*  
263 *hermanni*, *T. graeca*) failed to detect herpesvirus (Mathes et al., 2001). A situation that  
264 contrasts with well-documented infections in free-ranging chelonians in North America  
265 (Jacobson, 1994; Berish et al., 2000; Jacobson et al., 2012; Kane et al., 2017; Weitzman et  
266 al., 2017; Lindemann et al., 2019; Orton et al., 2020). Further studies are needed to  
267 determine to what extent the presence of URTD pathogens results from recent  
268 transmissions from pet to wild tortoises in Europe, *versus* insufficient investigations in

269 natural settings. Unfortunately, monitoring infection prevalence and severity is difficult in  
270 the field. Underestimations are likely because infected animals that may die are quickly  
271 removed prior to sampling. Further, weakened sick tortoises may well remain concealed and  
272 may not be easily detected in the field.

273

#### 274 ***Pet as potential vectors***

275 The primary route of transmission of Herpesvirus and *Mycoplasma* is horizontal via contact  
276 between individuals (DiGeronimo et al., 2019). Interspecific transmission has been  
277 demonstrated (Origgi et al., 2004; Soares et al., 2004; Salinas et al., 2011). Tortoise species  
278 are often mixed up in cages or enclosures. Overall, very high prevalence of infection in  
279 captivity is expected (Kolesnik et al., 2017). Unfortunately, tortoises and turtles frequently  
280 escape from captivity, or are voluntary released, and can settle in novel habitats. This  
281 process opens highways for pathogens. In this study, the high number of exotic tortoises  
282 observed vagrant (e.g. isolated individuals walking nearby private properties) or settled in  
283 WHT natural populations illustrate that introduction of exotic pet tortoises is an ongoing  
284 process. Chelonian pet trades are intensifying worldwide (Stanford et al., 2020), including  
285 European tortoises with massive exports of EHT and spur-thighed tortoises from Turkey,  
286 Balkan countries or North Africa to France, Spain and Italy (Ljubisavljević et al., 2011).

287

#### 288 ***Infection risks and diseases***

289 Lack of severe clinical signs should be treated with caution. Silent TeHV and *Mycoplasma*  
290 infections have been reported in tortoises (Orrigi, 2012; Withfield et al., 2018). Multiple  
291 strains of pathogens circulate worldwide (Salinas et al., 2011; Jacobson et al., 2014; Kolesnik  
292 et al., 2017), they continuously evolve while pathology and coinfections risks increase with  
293 pathogen diversity (Kari et al., 2008). Thus, constant introductions of infected pets into

294 natural populations represent a threat through the emergence of infectious diseases,  
295 especially if exotic tortoises tolerate and thus carry pathogens that can cause outbreaks in  
296 less-tolerant native species (Berish et al., 2010; Jacobson et al., 2014; Whitfield et al., 2018;  
297 DiGeronimo, 2019; Goessling et al., 2019). Environmental factors, like seasonal variations of  
298 immunity and physiological stress can perturb equilibriums with pathogens, tipping the  
299 balance toward diseases; especially in case of multiple infections (Sandmeier et al., 2013;  
300 Goessling et al., 2016).

301 In European tortoises, the presence of herpesvirus and the high prevalence of  
302 mycoplasma in natural populations were only suspected prior to the current study. But the  
303 paucity of information regarding possible health impact of TeHV, in combination with  
304 mycoplasma, along with the spectre of emerging serious diseases caused by picornavirus in  
305 captive Hermann's tortoises in Spain for example (Martinez-Silvestre et al., 2020), prompts  
306 for further studies.

307

### 308 ***Perspectives and recommendations***

309 French continental populations of Hermann's tortoise represent relicts of the distribution of  
310 a previously widespread and abundant species. It is crucial to not add infectious burden to  
311 the multitude of existing threats (e.g. habitat fragmentation, sprawling urbanization,  
312 frequent fires, illegal harvesting, wild-boars, dogs). Both the prevalence and demographic  
313 impact of URTD in the field should be carefully monitored. Pet owners should be informed  
314 that reproducing tortoises in captivity and releasing individuals in the field may threaten  
315 wild populations. Exotic tortoises should be removed from native populations. Long-term  
316 mark-recapture surveys should be coupled with health checking, including monitoring of  
317 most deleterious strains of HeHV (Gandar et al., 2015). Sanitary protocols are needed to  
318 handle free-ranging tortoises; nasal and oral secretions, feces, and even urine are

319 contaminating (Origgi et al., 2012). Similarly, strict protocols are needed during conservation  
320 translocations; notably because individuals often travel long distances before settling (Pille  
321 et al., 2018), while stress associated with release may promote virus activation (Griffith,  
322 1993; Martel et al., 2009; Jacobson et al., 2012). Furthermore, captive individuals carrying a  
323 wide range of pathogens and parasites represent additional risks to URD transmission and  
324 should be treated specifically (Ahne 1993; Chávarri et al. 2012).

325

### 326 **Acknowledgements**

327 We thank Silvia Blahak (Detmold) for herpesvirus and mycoplasma testing. This study was  
328 funded by “La Fondation Klaus Zegarski pour la conservation et protection des tortues  
329 méditerranéennes”, and the DREAL-PACA. This project was conducted under the permits  
330 delivered by prefectural authorities on July, 13<sup>th</sup> 2012 and February, 26<sup>th</sup> 2013.

331

### 332 **References**

- 333 Ahne, W. (1993). Viruses of chelonia. *Journal of Veterinary Medicine, Series B*, 40: 35-45.
- 334 Auliya, M., Altherr, S., Ariano-Sanchez, D., Baard, E. H., Brown, C., Brown, R. M., ... &  
335 Hintzmann, J. (2016). Trade in live reptiles, its impact on wild populations, and the role of  
336 the European market. *Biological Conservation*, 204: 103-119.
- 337 Ballouard, J.-M., Gayraud, R., Rozec, F., Besnard, A., Caron, S., Bech, N., & Bonnet, X. (2019).  
338 Excellent performances of dogs to detect cryptic tortoises in Mediterranean scrublands.  
339 *Biodiversity and Conservation*, 28: 4027-4045. [https://doi.org/10.1007/s10531-019-](https://doi.org/10.1007/s10531-019-01863-z)  
340 [01863-z](https://doi.org/10.1007/s10531-019-01863-z).
- 341 Bonnet, X., El Hassani, M. S., Lecq, S., Michel, C. L., El Mouden, E. H., Michaud, B., & Slimani,  
342 T. (2016). Blood mixtures: impact of puncture site on blood parameters. *Journal of*  
343 *Comparative Physiology B*, 186: 787-800.

- 344 Berry, K. H. & Christopher, M.M. (2001). Guidelines for the field evaluation of desert tortoise  
345 health and disease. *Journal of Wildlife Diseases*, 37: 427-450.
- 346 Berish, J. E. D., Wendland, L. D., & Gates, C. A. (2000). Distribution and prevalence of upper  
347 respiratory tract disease in gopher tortoises in Florida. *Journal of Herpetology* 5-12.
- 348 Berish, J. E.D, Wendland, L. D., Kiltie, R. A., Garrison, E. P., & Gates, C. A. (2010). Effects of  
349 mycoplasmal upper respiratory tract disease on morbidity and mortality of gopher  
350 tortoises in northern and central Florida. *Journal of Wildlife Diseases*, 46: 695-705.
- 351 Bertolero, A., Cheylan, M., Hailey, A., Livoreil, B., & Willemsen, R. (2011). *Testudo hermanni*  
352 (Gmelin 1789) Hermann's Tortoise. In A. Rhodin, P. Pritchard, P. VanDijk, R. Saumure, K.  
353 Buhlmann, J. Iverson, & Mittermeier, R. *Conservation Biology of freshwater turtles and*  
354 *tortoises: a compilation project of the IUCN/SSC tortoise and freshwater turtle specialist*  
355 *group. Chelonian Research* 5: 1-20.
- 356 Brown, M. B., I. M. Schumacher, P. A. Klein, K. Harris, Correll, T. & Jacobson, E. R. (1994).  
357 *Mycoplasma agassizii* causes upper respiratory tract disease in the desert tortoise.  
358 *Infection Immunology*, 62: 4580–4586.
- 359 Brown, D.R. Schumacher, I.M., Mclaughlin, L.D., Wendland, M.B., Brown, M.B., Klein, P.A. &  
360 Jacobson, E.R. (2002). Application of diagnostic tests for mycoplasmal infections of desert  
361 and gopher tortoises, with management recommendations. *Chelonian Conservation and*  
362 *Biology*, 4: 497-507.
- 363 Chávarri, M., Berriatua, E., Giménez, A., Gracia, E., Martínez-Carrasco, C., Ortiz, J. M., & de  
364 Ybáñez, R. R. (2012). Differences in helminth infections between captive and wild spur-  
365 thighed tortoises *Testudo graeca* in southern Spain: a potential risk of reintroductions of  
366 this species. *Veterinary parasitology*, 187: 491-497.
- 367 Daszak, P., Cunningham, A.A. & Hyatt, A.D., (2000). *Emerging Infectious Diseases of Wildlife*  
368 *Threats to Biodiversity and Human Health. Science*, 287: 443-449.

- 369 Deem, S. L., Karesh, W. B., & Weisman, W. (2001). Putting theory into practice: wildlife  
370 health in conservation. *Conservation biology*, 15: 1224-1233.
- 371 DiGeronimo, P. M., Hansen, C., La'Toya, V. L., Adamovicz, L. A., & Allender, M. C. (2019).  
372 Detection of mycoplasma SP. in Indochinese box turtles (*cuora bourreti*). *Journal of Zoo*  
373 *and Wildlife Medicine*, 50: 254-257.
- 374 Gandar, F., Wilkie, G. S., Gatherer, D., Kerr, K., Marlier, D., Diez, M., Marschang, R E., Mast,  
375 J., Dewals, B. G., Davison, A.J. & Vanderplasschen, A. F. (2015). The genome of a tortoise  
376 herpesvirus (testudinid herpesvirus 3) has a novel structure and contains a large region  
377 that is not required for replication in vitro or virulence in vivo. *Journal of virology*, 89:  
378 11438-11456.
- 379 Goessling, J. M., Guyer, C., Godwin, J. C., Hermann, S. M., Sandmeier, F. C., Smith, L. L. &  
380 Mendonça, M. T. (2019). Upper respiratory tract disease and associated diagnostic tests  
381 of mycoplasmosis in Alabama populations of Gopher tortoises, *Gopherus polyphemus*.  
382 *PloS one*, 14: e0214845.
- 383 Gracià, E., Rodriguez-Caro R.C., Ferrandez, M., Martinez-Silvestre, A., Pérez-Ibarra, I.,  
384 Amahjour, R., ... & Giménez, A. (2020). From troubles to solutions: conservation of  
385 Mediterranean tortoises under global change. *Basic and Applied Herpetology*, 34, 5-6.
- 386 Griffith, B., Scott, J.M., Carpenter, J.W. & Reed C. (1993). Animal translocations and  
387 potential disease transmission. *Journal of Zoo and Wildlife Medicine*, 24:231-236.
- 388 Hernandez-Divers, S.M., Hernandez-Divers, S.J. & Wyneken, J. (2002). Angiographic,  
389 anatomic and clinical technique descriptions of a subcarapacial venipuncture site for  
390 chelonians. *Journal of Herpetological Medicine and Surgery*, 12: 32-37.
- 391 Hidalgo-Vila, J., Martínez-Silvestre, A., Pérez-Santigosa, N., León-Vizcaíno, L. & Díaz-  
392 Paniagua, C. (2020). High prevalence of diseases in two invasive populations of red-eared



- 393 sliders (*Trachemys scripta elegans*) in southwestern Spain. *Amphibia-Reptilia*, 1(aop): 1-  
394 10. <https://doi.org/10.1163/15685381-bja10021>
- 395 Jacobson, E. R. (1994). Causes of mortality and diseases in tortoises: a review. *Journal of Zoo*  
396 *and Wildlife Medicine*, 25: 2-17.
- 397 Jacobson, E. R. & Berry, K. H. (2012). *Mycoplasma testudineum* in free-ranging desert  
398 tortoises, *Gopherus agassizii*. *Journal of Wildlife Diseases*, 48: 1063-1068.
- 399 Jacobson, E.R. Kristin, H. Berry, J., Wellehan, Jr. F. X., Oraggi, F., Childress, A. L. Braun, J.,  
400 Schrenzel, M., Yee, J. & Rideout B. (2012). Serologic and molecular evidence for  
401 Testudinid herpesvirus 2 infection in wild Agassiz's desert tortoises, *Gopherus agassizii*.  
402 *Journal of Wildlife Diseases*, 48: 747–757.
- 403 Jacobson, E.R., Brown, M.B., Wendland, L.D., Brown, D.R., Klein, P.A., Christopher, M.M., &  
404 Berry K.H. (2014). Mycoplasmosis and upper respiratory tract disease of tortoises: a  
405 review and update. *The Veterinary Journal*, 201: 257–264.
- 406 Kane, L. P., Allender, M. C., Archer, G., Dzhaman, E., Pauley, J., Moore, A. R., Ruiz M. O.,  
407 Smith, R.L. Byrd J. & Phillips, C. A. (2017). Prevalence of *Terrapene herpesvirus 1* in free-  
408 ranging eastern box turtles (*Terrapene carolina carolina*) in Tennessee and Illinois, USA.  
409 *Journal of wildlife diseases*, 53: 285-295.
- 410 Kari, L., Whitmire, W. M., Carlson, J. H., Crane, D. D., Reveneau, N., Nelson, D. E., Mabey  
411 D.C.W., Bailey R.L., Holland M.J., MacClarty G. & Caldwell, H. D. (2008). Pathogenic  
412 diversity among *Chlamydia trachomatis* ocular strains in nonhuman primates is affected  
413 by subtle genomic variations. *The Journal of infectious diseases*, 197: 449-456.
- 414 Kolesnik, E., Obiegala, A. & Marschang, R. E. (2017). Detection of *Mycoplasma* spp.,  
415 herpesviruses, topiviruses, and ferlaviruses in samples from chelonians in Europe. *Journal*  
416 *of Veterinary Diagnostic Investigation*, 29: 820-832.

- 417 Lecis, R., Paglietti, B. Rubino, S. Are, B. M. Muzzeddu, M. Berlinguer, F. Chessa, B. Pittau  
418 M. & A. Alberti, (2011). Detection and Characterization of Mycoplasma spp. and  
419 Salmonella spp. in Free-living European Tortoises (*Testudo hermanni*, *Testudo graeca*,  
420 and *Testudo marginata*). Journal of Wildlife Diseases, 47: 717–724.
- 421 Lindemann, D. M., Allender, M. C., Thompson, D., Glowacki, G. A., Newman, E. M.,  
422 Adamovicz, L. A., & Smith, R. L. (2019). Epidemiology of Emydoidea herpesvirus 1 in free-  
423 ranging Blanding's turtles (*Emydoidea blandingii*) from Illinois. Journal of Zoo and Wildlife  
424 Medicine, 50: 547-556.
- 425 Livoreil, B., (2009). Distribution of the endangered Hermann's tortoise *Testudo hermanni*  
426 *hermanni*, in Var, France, and recommendations for its conservation. Oryx, 43: 299-305.
- 427 Ljubisavljevic, K., Dzukic, G. & Kalezić, M. L. (2011). The commercial export of the land  
428 tortoises (*Testudo* spp.) from the territory of the former Yugoslavia: A historical review  
429 and the impact of overharvesting on wild populations. North- Western Journal of  
430 Zoology, 7: 250–260.
- 431 Marenzoni, M. L., Santoni, L., Felici, A., Maresca, C., Stefanetti, V., Sforza, M., Franciosini, M.  
432 P. Proietti, P.C. & Origgi, F. C. (2018). Clinical, virological and epidemiological  
433 characterization of an outbreak of Testudinid Herpesvirus 3 in a chelonian captive  
434 breeding facility: Lessons learned and first evidence of TeHV3 vertical transmission. PloS  
435 one, 13(5), e0197169.
- 436 Marschang, R.E., & Schneider, R.M. (2007) Antibodies to viruses in wild-caught spur-thighed  
437 tortoises (*Testudo graeca*) in Turkey. Veterinary Record, 161:102-103.
- 438 Martel, A., Blahak, S., Vissenaekens, H. & Pasmans, F. (2009). Reintroduction of clinically  
439 healthy tortoises: The Herpesvirus Trojan Horse. Journal of Wildlife Diseases, 45: 218–  
440 220

- 441 Martínez-Silvestre, A., Mateu de Antonio, E., Ramis, A. & Majó, N. (1999). Etiología y  
442 descripción clínica de la rinitis crónica en tortuga mora (*Testudo graeca*). Revista  
443 Española de Herpetología, 13: 27-36.
- 444 Martínez-Silvestre, A., Soler Massana, J., Solé, R. & Medina, D. (2001). Reproducción de  
445 quelonios aloctonos en Cataluña en condiciones naturales. Boletín de la Asociación  
446 Herpetologica Española, 12: 41-43.
- 447 Martínez-silvestre, A., Cadenas, V., Soler, J., Martínez, D., Pena, L. & Velarde, R. (2020).  
448 Infección por Picornavirus en tortuga mediterránea (*Testudo hermanni*) en un programa  
449 de conservación in situ en Cataluña. Boletín de la Asociación Herpetologica Española, 31:  
450 7-12.
- 451 Mathes, K.A., Blahak, S., Jacobson, E.R., Braun, D.R., Shumacher, L.M., Fertard, B. (2001).  
452 *Mycoplasma* and herpesvirus detection in European terrestrial tortoises in France and  
453 Morocco. *In Proceedings of the Association of Reptilian and Amphibian Veterinarians,*  
454 *Eight Annual Conference, Orlando, Florida, 18-23 September 2001, pp. 97-99*
- 455 Origgi, F.C., (2012). Testudinid Herpesviruses: A Review. *Journal of Herpetological Medicine*  
456 *and Surgery*, 22: 42-54.
- 457 Origgi, F. C., Klein, P. A., Mathes, K., Blahak, S., Marschang, R. E., Tucker, S. J., & Jacobson, E.  
458 R. (2001). Enzyme-linked immunosorbent assay for detecting herpesvirus exposure in  
459 Mediterranean tortoises (spur-thighed tortoise [*Testudo graeca*] and Hermann's tortoise  
460 [*Testudo hermanni*]). *Journal of Clinical Microbiology*, 39: 3156-3163.
- 461 Origgi, F.C., Romero, C.H., Bloom, D.C., Klein, P.A. Gaskin, J.M., Tucker, S.J., & Jacobson, E.R.  
462 2004 Experimental transmission of a herpesvirus in Greek tortoises (*Testudo graeca*).  
463 *Veterinary Pathology*, 41, 50–61.
- 464 Orton, J. P., Morales, M., Fontenele, R. S., Schmidlin, K., Kraberger, S., Leavitt, D. J., Webster,  
465 T.H. Wilson, M.A., Kusumi, K., Dolby, G A. & Varsani, A. (2020). Virus Discovery in Desert

- 466 Tortoise Fecal Samples: Novel Circular Single-Stranded DNA Viruses. *Viruses*, 12: 143;  
467 doi:10.3390/v12020143
- 468 Pérez, M., Livoreil, B., Mantovani, S., Boisselier, M.C., Crestanello, B., Abdelkrim, J., Bonillo,  
469 C., Goutner, V., Lambourdière, J., Pierpaoli, M., Sterijovski, B., Tomovic, L., Vilaça, S.T.,  
470 Mazzotti, S. & Bertorelle, G. (2013). Genetic Variation and Population Structure in the  
471 Endangered Hermann's Tortoise: The Roles of Geography and Human-Mediated  
472 Processes. *Journal of Heredity*, 105: 70-81.
- 473 Pille, F., Caron, S., Bonnet, X., Deleuze, S., Busson, D., Etien, T., Girard F., & Ballouard, J. M.  
474 (2018). Settlement pattern of tortoises translocated into the wild: a key to evaluate  
475 population reinforcement success. *Biodiversity and conservation*, 27: 437-457.
- 476 Salinas, M., Francino, O., Sánchez, A. & Altet L. (2011). Mycoplasma and Herpesvirus PCR  
477 Detection in Tortoises with Rhinitis-stomatitis Complex in Spain. *Journal of Wildlife*  
478 *Diseases*, 47: 195-200.
- 479 Sandmeier, F.C., Tracy, C.R., DuPre, S.A., & Hunter, K.W. (2009). Upper respiratory tract  
480 disease (URTD) as a threat to desert tortoise populations: A reevaluation. *Biological*  
481 *Conservation*, 142:1255–1268.
- 482 Sandmeier, F.C., Tracy C.R., Hagerty, B.E., DuPre, S., Mohammadpour, H. & K., Hunter,  
483 (2013). Mycoplasmal Upper Respiratory Tract Disease Across the Range of the  
484 Threatened Mojave Desert Tortoise: Associations with Thermal Regime and Natural  
485 Antibodies. *EcoHealth*, 10: 63–71.
- 486 Soares, J.F., Chalker, V.J., Erles, K., Holtby, S., Waters, M., & McArthur, S. (2004) Prevalence  
487 of *Mycoplasma agassizii* and chelonian herpesvirus in captive tortoises (*Testudo* spp.) in  
488 the United Kingdom. *Journal of Zoo and Wildlife Medicine*, 35: 25-33.
- 489 Soler, J., Pfau, B., & Martinez-Silvestre, A. (2012). Detecting intraspecific hybrids in *Testudo*  
490 *hermanni*. *Radiata*, 21: 4-29.

491 Stanford, C. B., Iverson, J. B., Rhodin, A. G., van Dijk, P. P., Mittermeier, R. A., Kuchling, G.  
492 Berry, N. H., Bertolero, A., Bjorndal, K. A., Blanck, T. E.G., Buhlmann, K.A., Burke, R. L.,  
493 Congdon, J. D., Diagne, Edwards T., Eiseberg, C. C., Ennen, J. R Forero-Medina, G.,  
494 Frankel, M., Fritz, U., Gallego-García, N., Georges, A. J., Gibbons, W., Gong, S.,  
495 Goode, E. V., Shi, H.T., Hoang H., Hofmeyrn, M. D., Horne, B. D., Hudson, R. J. Juvik,  
496 O., Kiester, R.A., Koval P., Le, M., Lindeman, P.V., Lovich, J.E., Luiselli, L.,  
497 McCormack, T.E.M., Meyer, G.A., Páez, V. P., Platt, K., Platt, S. G., Pritchard, P., Quinn,  
498 H. R., Roosenburg, W. M., Seminoff, J. A., Shaffer, H. B., Spencer R., Van Dyke J. U.  
499 Vogt. R. C. & Walde, A. D. (2020). Turtles and tortoises are in trouble. *Current Biology*, 30:  
500 721-735.

501 Spielman, D., Brook, B. W., Briscoe, D. A., & Frankham, R. (2004). Does inbreeding and loss  
502 of genetic diversity decrease disease resistance?. *Conservation Genetics*, 5: 439-448.

503 Weitzman, C.L., Sandmeier, FC, & Tracy, C.R. (2017). Prevalence and diversity of the upper  
504 respiratory pathogen *Mycoplasma agassizii* in Mojave desert tortoises (*Gopherus*  
505 *agassizii*). *Herpetologica*, 73: 113–120. (doi:10.1655/Herpetologica-D-16-00079.1)

506 Whitfield, S. M., Ridgley, F. N., Valle, D., & Atteberry, N. (2018). Seroprevalence of  
507 *Mycoplasma agassizii* and *Mycoplasma testudineum* in Wild and Waif Gopher Tortoises  
508 (*Gopherus polyphemus*) in Miami-Dade County, Florida, USA. *Herpetological Review*, 49:  
509 47-49.

510

511

512

513

514 **Figure 1:** Sampling sites inside the French continental distribution range of WHT.

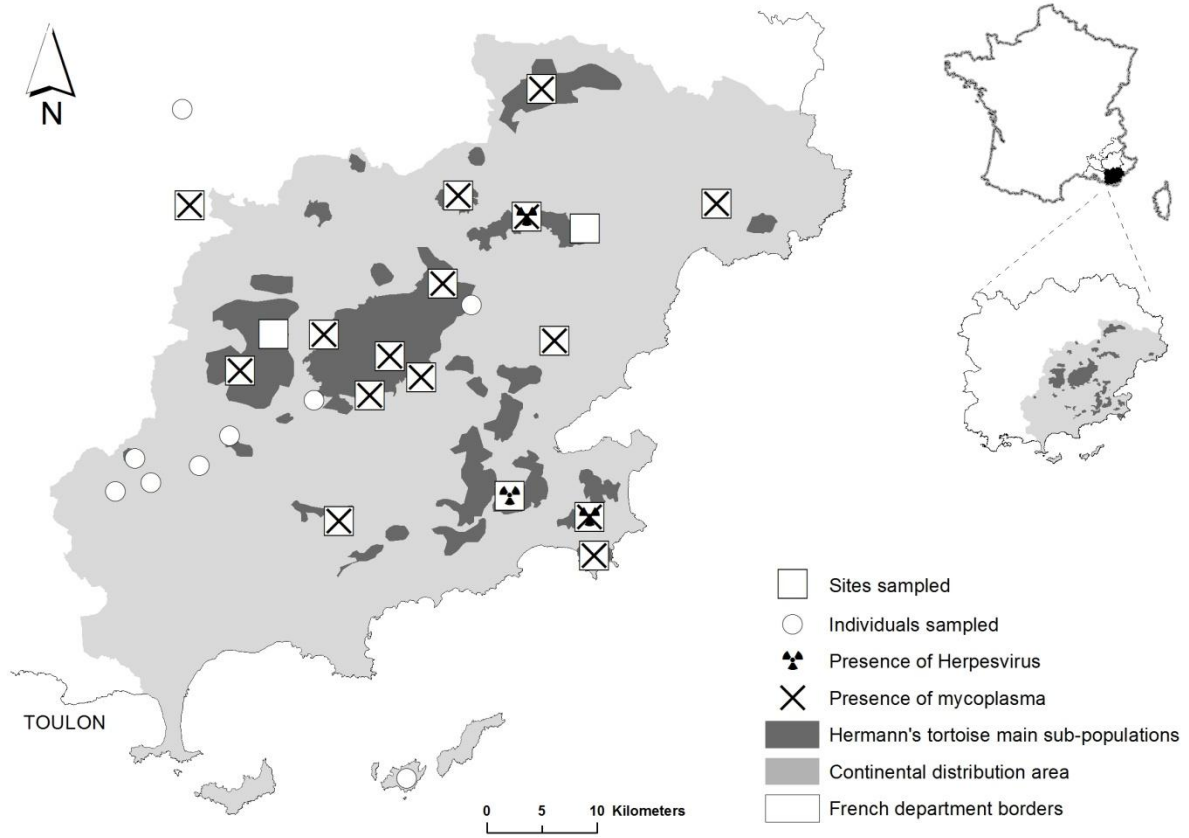

515

516

517 **Table 1:** Numbers of individual tortoises sampled in function of species and subspecies  
518 (taxon) and in function of the situation where the animals were found (free-ranging, captive  
519 or vagrant, see text for details). *Testudo hermanni hermanni* is named WHT in this study,  
520 *T.h. boettgeri* EHT. Different subspecies of the spur-thighed tortoises (*T. graeca*) are not  
521 distinguished in the main text. WHT x EHT stands for hybrids.  
522

| Taxon                  | Free-ranging | Captive | Vagrant | TOTAL |
|------------------------|--------------|---------|---------|-------|
| <i>T. h. hermanni</i>  | 421          | 65      | 11      | 497   |
| <i>T. h. boettgeri</i> | 2            | 8       | 1       | 11    |
| <i>T. g. iberica</i>   | 1            | -       | -       | 1     |
| <i>T. g. sp.</i>       | 9            | 12      | 2       | 23    |
| <i>T. marginata</i>    | -            | 1       | -       | 1     |
| WHT x EHT              | 24           | 9       | 6       | 39    |
| TOTAL                  | 457          | 95      | 20      | 572   |

523

524

525 **Table 2:** Numbers of tests performed according to taxon and in function of the situation  
 526 where the animals were found. TeHV stands for Herpesvirus, SN for Serum Neutralization,  
 527 for PCR polymerase chain reaction test, Mycoplasma for *Mycoplasma agassizii*. Most  
 528 individuals were tested for both pathogens (TeHV + Myc)

| Test           | Taxon                  | Free-ranging | Captive | Vagrant | TOTAL |
|----------------|------------------------|--------------|---------|---------|-------|
| TeHV SN        | <i>T. h. hermanni</i>  | 253          | 48      | 8       | 309   |
|                | <i>T. h. boettgeri</i> | 2            | 7       | 1       | 10    |
|                | <i>T. g. iberia</i>    | 1            | 0       | 0       | 1     |
|                | <i>T. g. sp</i>        | 8            | 10      | 2       | 20    |
|                | <i>T. marginata</i>    | 0            | 0       | 0       | 0     |
|                | WHT x EHT              | 29           | 6       | 3       | 38    |
| TeHV PCR       | <i>T. h. hermanni</i>  | 253          | 58      | 10      | 321   |
|                | <i>T. h. boettgeri</i> | 2            | 7       | 1       | 10    |
|                | <i>T. g. iberia</i>    | 1            | 0       | 0       | 1     |
|                | <i>T. g. sp</i>        | 9            | 12      | 2       | 23    |
|                | <i>T. marginata</i>    | 0            | 1       | 0       | 1     |
|                | WHT x EHT              | 35           | 4       | 5       | 44    |
| Mycoplasma PCR | <i>T. h. hermanni</i>  | 392          | 65      | 11      | 468   |
|                | <i>T. h. boettgeri</i> | 2            | 8       | 1       | 11    |
|                | <i>T. g. iberia</i>    | 1            | 0       | 0       | 1     |
|                | <i>T. g. sp</i>        | 9            | 11      | 2       | 22    |
|                | <i>T. marginata</i>    | 0            | 1       | 0       | 1     |
|                | WHT x EHT              | 45           | 6       | 7       | 58    |
| TeHV + Myc     | <i>T. h. hermanni</i>  | 268          | 60      | 10      | 338   |
|                | <i>T. h. boettgeri</i> | 2            | 8       | 1       | 11    |
|                | <i>T. g. iberia</i>    | 1            | 0       | 0       | 1     |
|                | <i>T. g. sp</i>        | 9            | 11      | 2       | 22    |
|                | <i>T. marginata</i>    | 0            | 1       | 0       | 1     |
|                | WHT x EHT              | 38           | 5       | 5       | 48    |

529



530 **Table 3:** Results from the PCR tests for herpesvirus and mycoplasma infections (SN tests  
 531 were all negative) according to taxon and in function of the situation where the tortoises  
 532 were found. No individual was positive for both pathogens.

| Test       | Taxon                  | Free-ranging | Captive | Vagrant | TOTAL |
|------------|------------------------|--------------|---------|---------|-------|
| TeHV       | <i>T. h. hermanni</i>  | 7            | 0       | 0       | 7     |
|            | <i>T. h. boettgeri</i> | 0            | 0       | 0       | 0     |
|            | <i>T. g. iberia</i>    | 0            | -       | -       | 0     |
|            | <i>T. g. sp</i>        | 0            | 0       | 0       | 0     |
|            | <i>T. marginata</i>    | -            | -       | -       | -     |
|            | WHT x EHT              | 0            | 0       | 0       | 0     |
| Mycoplasma | <i>T. h. hermanni</i>  | 34           | 5       | 4       | 43    |
|            | <i>T. h. boettgeri</i> | 0            | -       | -       | 0     |
|            | <i>T. g. iberia</i>    | 1            | -       | -       | 1     |
|            | <i>T. g. sp</i>        | 4            | 2       | -       | 6     |
|            | <i>T. marginata</i>    | -            | 1       | -       | 1     |
|            | WHT x EHT              | 0            | 1       | -       | 1     |

533

534

535 **Table 4:** results from the PCR tests for herpesvirus and mycoplasma infections in the  
536 different sites sampled. Each site hosts a free-ranging population of WHT. Numbers indicate  
537 the number of positive individuals, percentages to the total number of sampled tortoises  
538 are provided into bracket.

| Sites                       | TeHV PCR | <i>Mycoplasma</i> |
|-----------------------------|----------|-------------------|
| 3 caps                      | 0        | 2 (11%)           |
| La Pardiguière              | 0        | 1 (4%)            |
| Callas                      | 0        | 4 (17%)           |
| Carcès                      | 0        | 2 (20%)           |
| Cogolin La Môle             | 4 (20%)  | 0                 |
| Estérel                     | 0        | 5 (18%)           |
| Flassans calcaire           | 0        | 0                 |
| Lambert                     | 0        | 1 (4%)            |
| Le Muy, St Luen             | 1 (8%)   | 2 (10%)           |
| Les Arcs                    | 0        | 3 (25%)           |
| Neuf Riaux, Est PDM         | 0        | 1 (3,4%)          |
| Ramatuelle                  | 2 (22%)  | 1 (6%)            |
| Redon                       | 0        | 2 (8%)            |
| Reserve National des Maures | 0        | 3 (17%)           |
| Roquebrune sur Argens       | 0        | 0                 |
| Les Mayons                  | 0        | 3 (5%)            |
| Sainte-Maxime               | 0        | 3 (17%)           |
| Vidauban                    | 0        | 1 (3%)            |

539
